# Supplementary material for: A 660-Kb Deletion with Antagonistic Effects on Fertility and Milk Production Segregates at High Frequency in Nordic Red Cattle: Additional Evidence for the Common Occurrence of Balancing Selection in Livestock
Source: PubMed Central journal article supplement (PMC3879169; doi:10.1371/journal.pgen.1004049), 2014-01-02
Supplement: pgen.1004049.s008.pdf [file pgen.1004049.s008.pdf]

## Text S2. Description of fertility traits

Breeding values for the following traits are separately calculated for Heifers (with suffix h) and for cows (with suffix c) wherever applicable

- (i) **Number of Insemination (AIS):** It is the number of insemination needed to get the cow/heifer into pregnancy; it reflects animal's ability to come to heat and to conceive.
- (ii) **Interval from calving to first insemination (ICF):** The trait is defined only for cows and it is the interval in days between calving and the subsequent insemination. It reflects cow's ability to resume reproductive cycle after calving.
- (iii) **Interval from First to Last insemination (IFL):** This is the number of days between the first and the last insemination a cow/heifer receives; it reflects the pregnancy rate and heat strength of an animal
- (iv) **56-day Non return rate (NRR):** This trait indicates whether a cow/heifer receives a second insemination 56 days post first insemination. All cows/heifers not re-inseminated within 56 days post first insemination are considered pregnant. The trait reflects the pregnancy rate.
- (v) **Heat strength (HST):** It is the ability of cow/heifer to show estrous, measured on subjective scale 1-5. The trait is recorded only in Sweden.
- (vi) **Fertility Index (FI):** It is an index estimated from the sub-indices for AIS in cows and heifers, ICF in cows, IFL in cows and heifers combined by means their respective economic values. It reflects the genetic ability of the bull's daughter to show estrous and to conceive with an insemination.

The number of animals with EBV records for different fertility traits is tabulated below

|               | <b>JER</b> | <b>HOL</b> | <b>RDCDNK</b> | <b>RDCSWE</b> | <b>RDCFIN</b> | <b>Total</b> |
|---------------|------------|------------|---------------|---------------|---------------|--------------|
| <b>aisc</b>   | 1171       | 4067       | 891           | 1714          | 2240          | 10083        |
| <b>aish</b>   | 1175       | 4071       | 893           | 1713          | 1972          | 9824         |
| <b>icf</b>    | 1174       | 4070       | 891           | 1714          | 2242          | 10091        |
| <b>iflc</b>   | 1173       | 4070       | 891           | 1714          | 2242          | 10090        |
| <b>iflh</b>   | 1173       | 4070       | 892           | 1713          | 1969          | 9817         |
| <b>nrrc</b>   | 1171       | 4070       | 891           | 1714          | 2240          | 10086        |
| <b>nrrh</b>   | 1177       | 4071       | 893           | 1713          | 1974          | 9828         |
| <b>frugti</b> | 1177       | 4072       | 894           | 1714          | 2242          | 10099        |

The number of records for de-regressed proofs for fertility and production traits is given below.

|      | <b>RDCDNK</b> | <b>RDCSWE</b> | <b>RDCFIN</b> |
|------|---------------|---------------|---------------|
| aisc | 776           | 1656          | 2165          |
| aish | 777           | 1664          | 2025          |
| icf  | 775           | 1649          | 2156          |
| iflc | 777           | 1656          | 2166          |
| iflh | 777           | 1664          | 2103          |
| nrrc | 776           | 1650          | 2158          |
| nrrh | 777           | 1664          | 2141          |
| milk | 925           | 1494          | 2376          |
| prot | 925           | 1494          | 2376          |
| fat  | 925           | 1494          | 2376          |
